# Supplementary material for: Comparison of [18F]FDG PET/CT and MRI for Treatment Response Assessment in Multiple Myeloma: A Meta-Analysis
Source: MDPI journal article supplement (doi:10.3390/diagnostics11040706), 2021-04-15
Supplement: s1 [file s1]

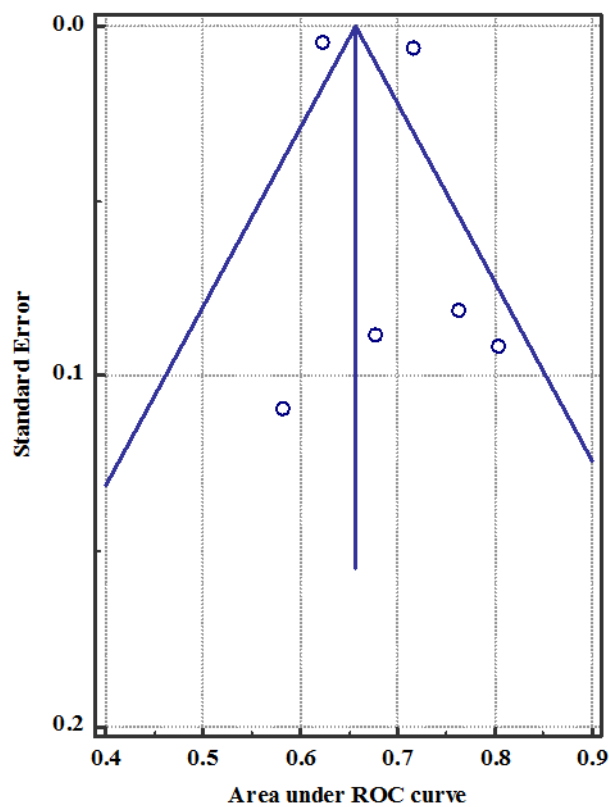

Funnel plot of AUC value in FDG PET/CT

#### Publication bias

| Egger's test       |                   |
|--------------------|-------------------|
| Intercept          | 1.3412            |
| 95% CI             | -7.1967 to 9.8790 |
| Significance level | P = 0.6852        |
| Begg's test        |                   |
| Kendall's Tau      | -0.06667          |
| Significance level | P = 0.8510        |

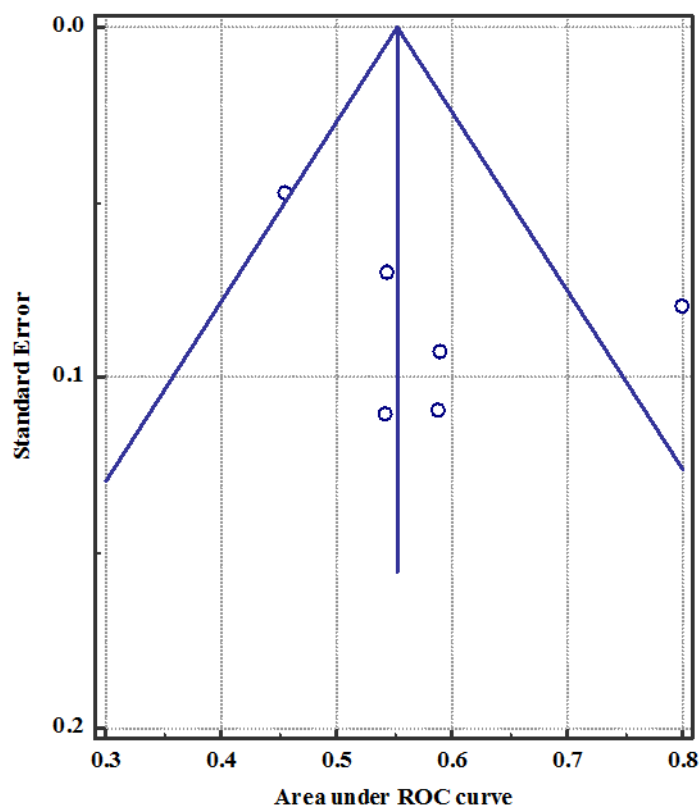

Funnel plot of AUC value in MRI

#### Publication bias

| Egger's test       |                   |
|--------------------|-------------------|
| Intercept          | 2.7068            |
| 95% CI             | -3.0955 to 8.5091 |
| Significance level | P = 0.2649        |
| Begg's test        |                   |
| Kendall's Tau      | 0.2000            |
